# Supplementary material
Source: Springer Nature journal article supplement (https://www.springermedizin.de/resource/supplementary/12885_2014_5198_MOESM10_ESM.pdf/9468570)
Supplement: MOESM10 [file 9468570]

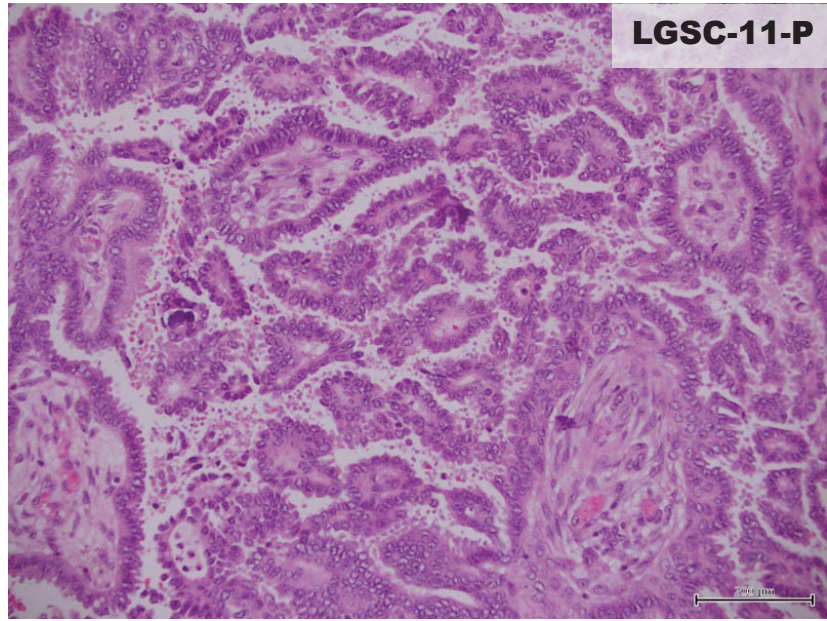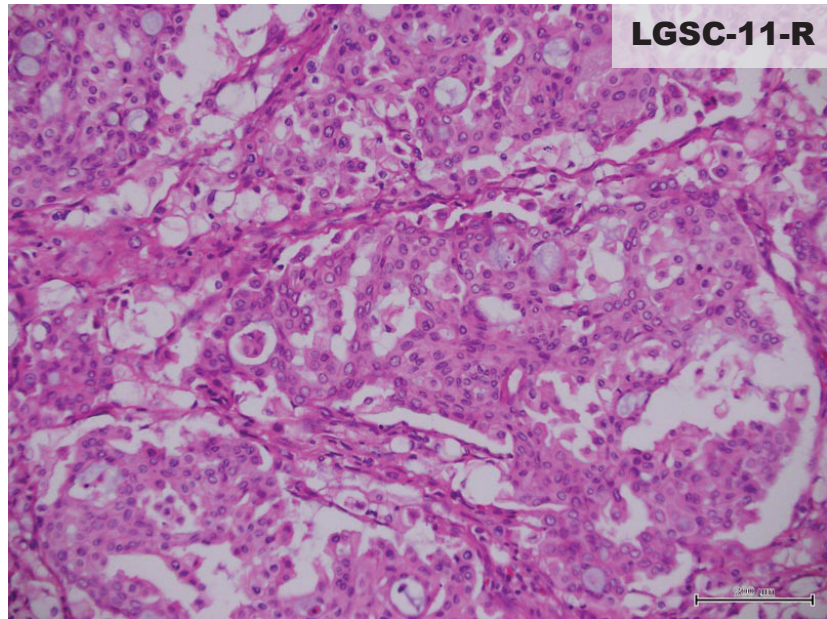

**Additional File 12. LGSC-11 Case Images.**
